# Supplementary material for: Combining occurrence and abundance distribution models for the conservation of the Great Bustard
Source: PubMed Central journal article supplement (PMC5732545; doi:10.7717/peerj.4160), 2017-12-13

Appendix 2 partial dependence plot for occurrence model (SDM) and abundance model (SAM)  
SDM

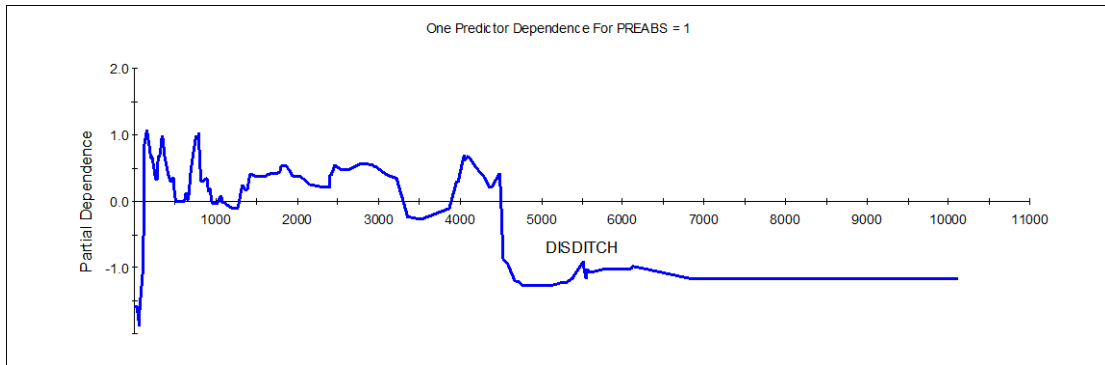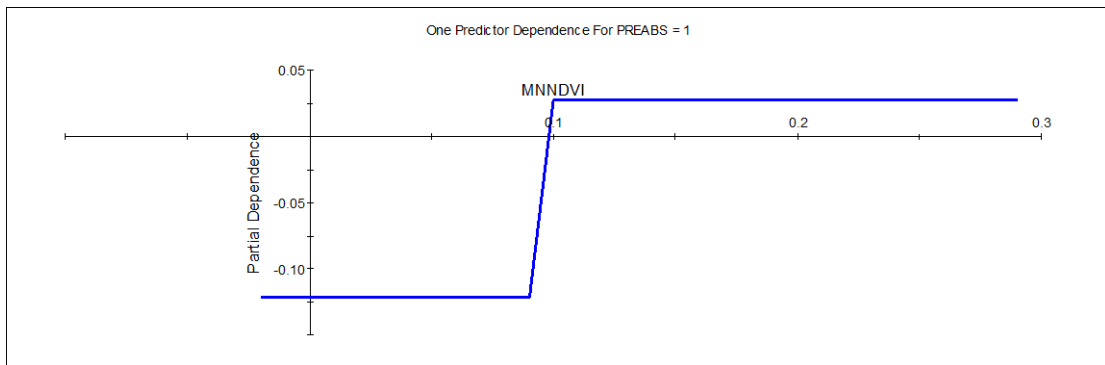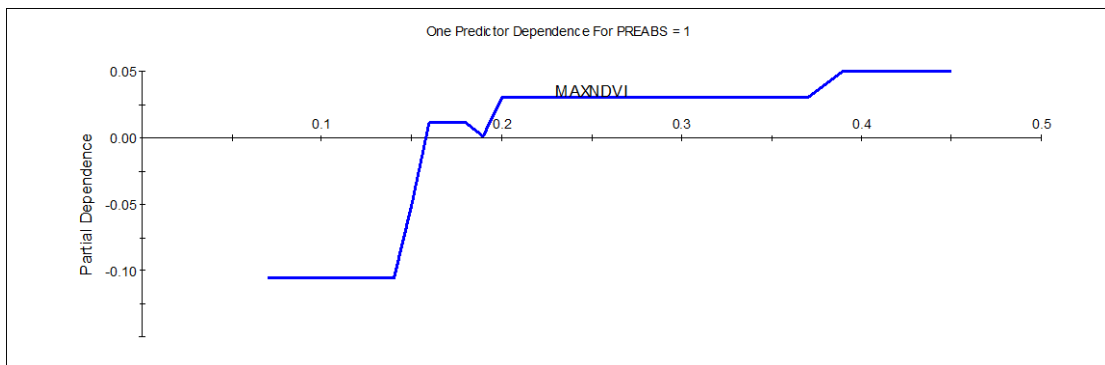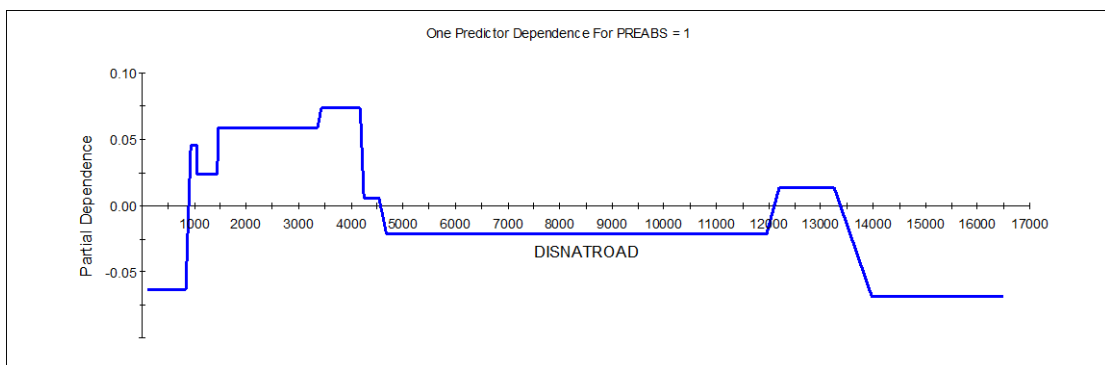

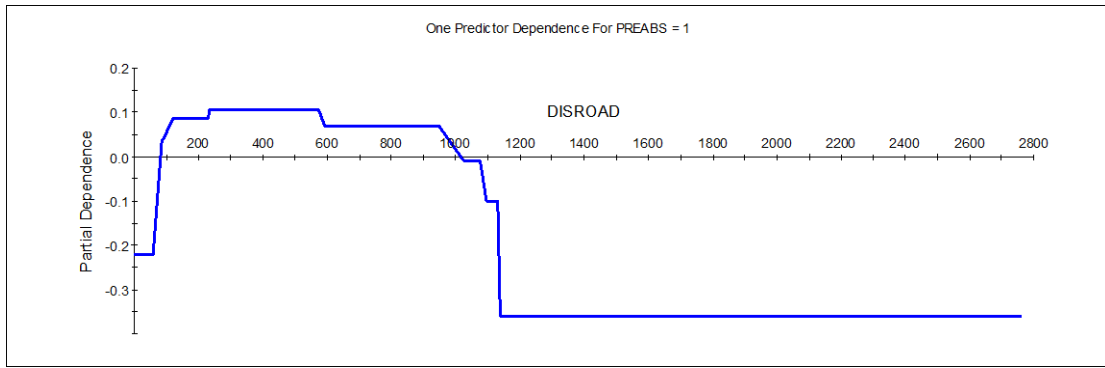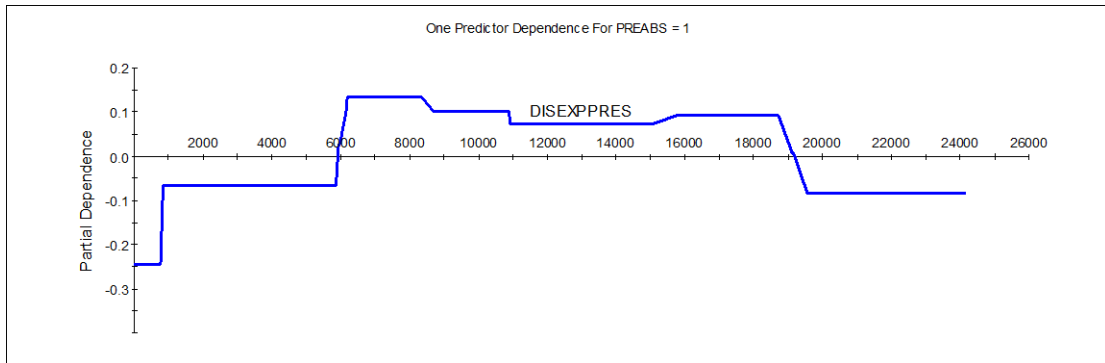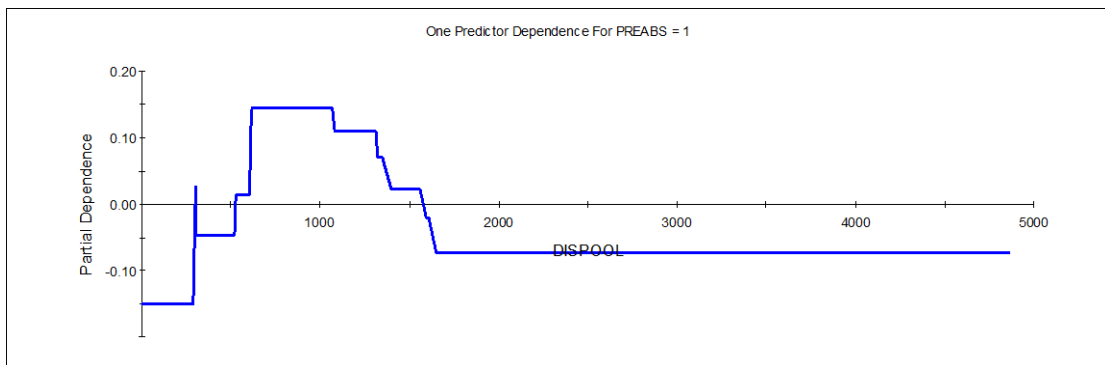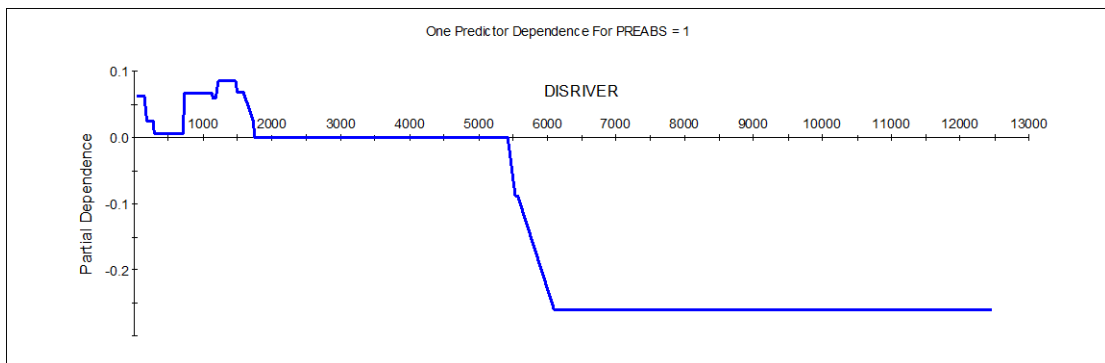

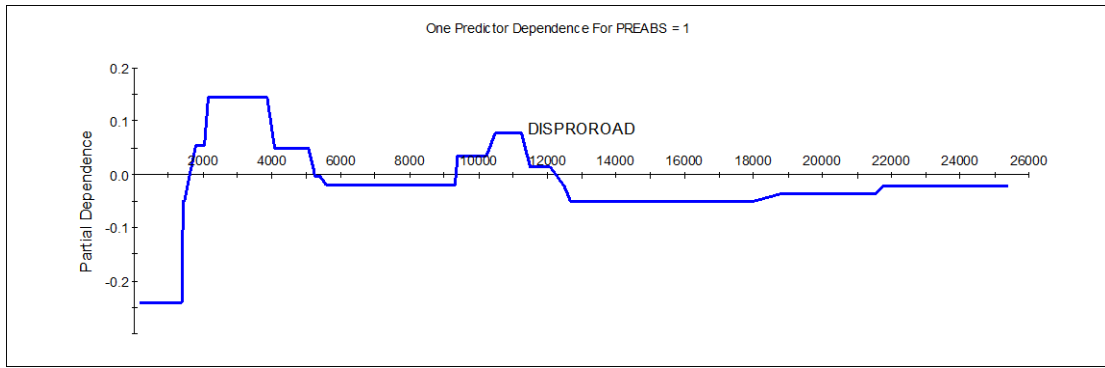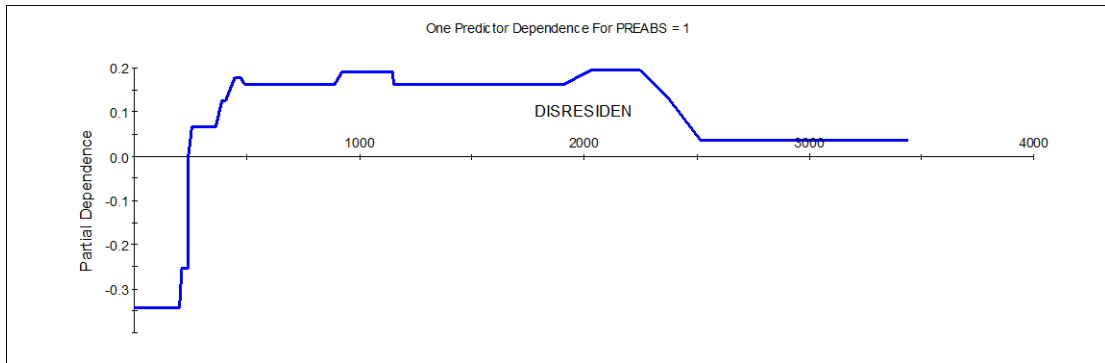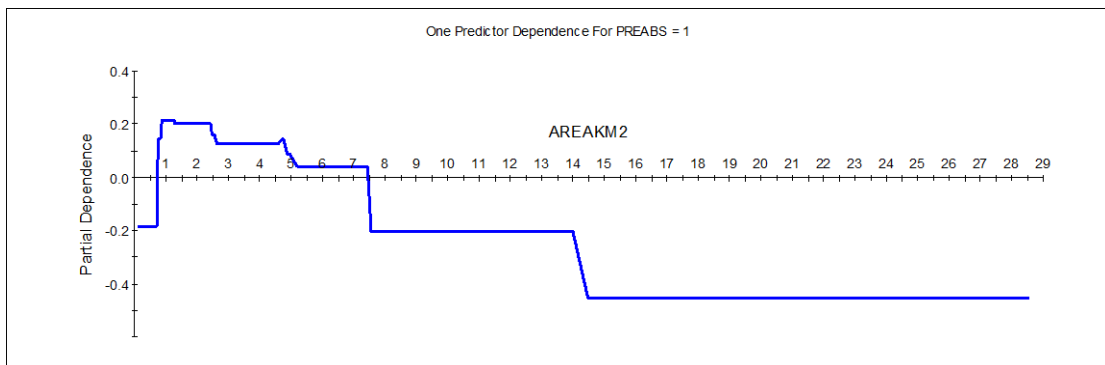

# SAM

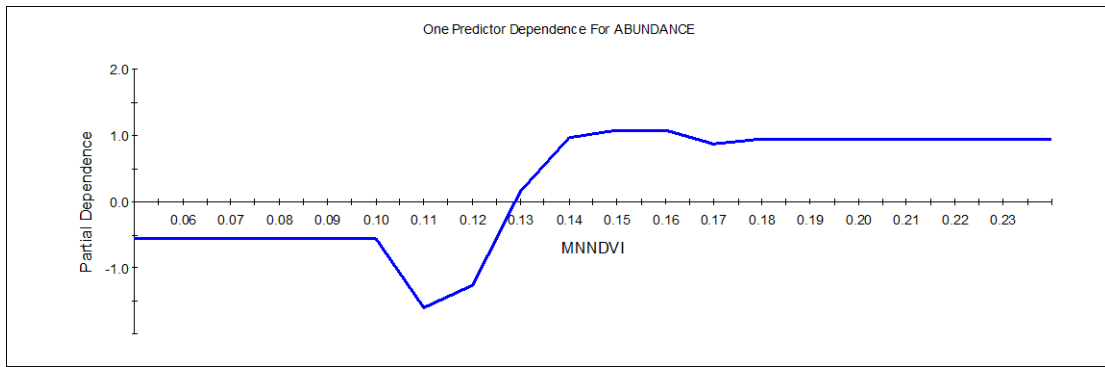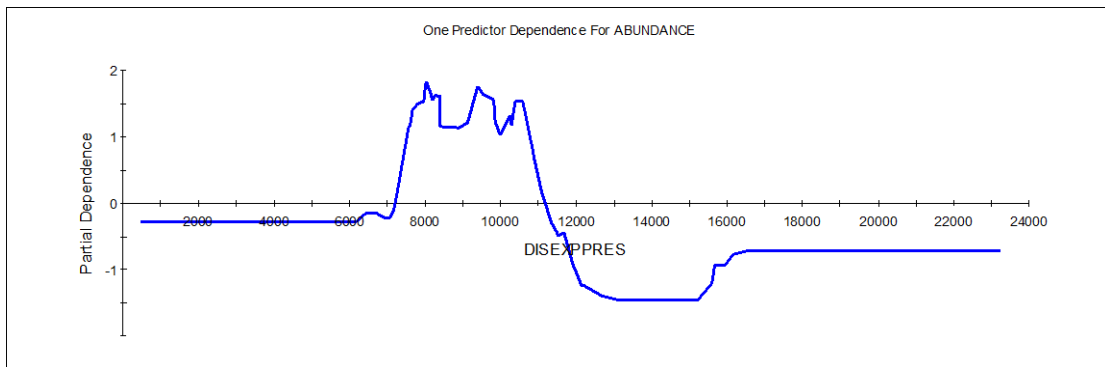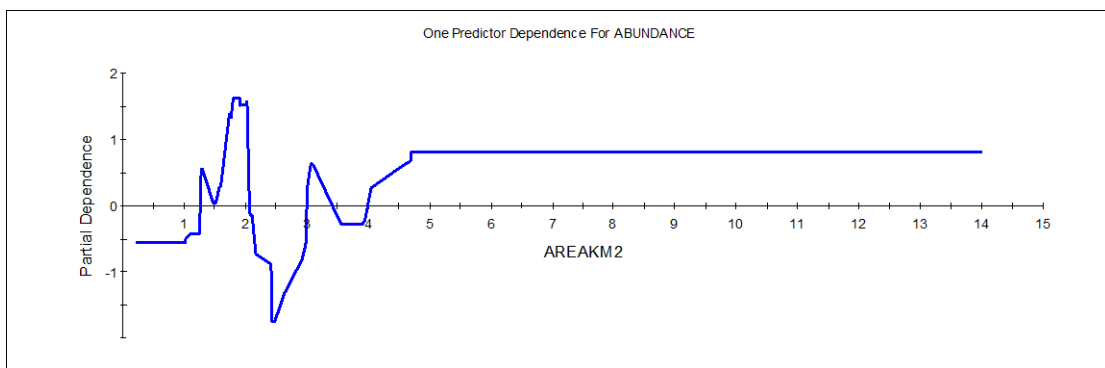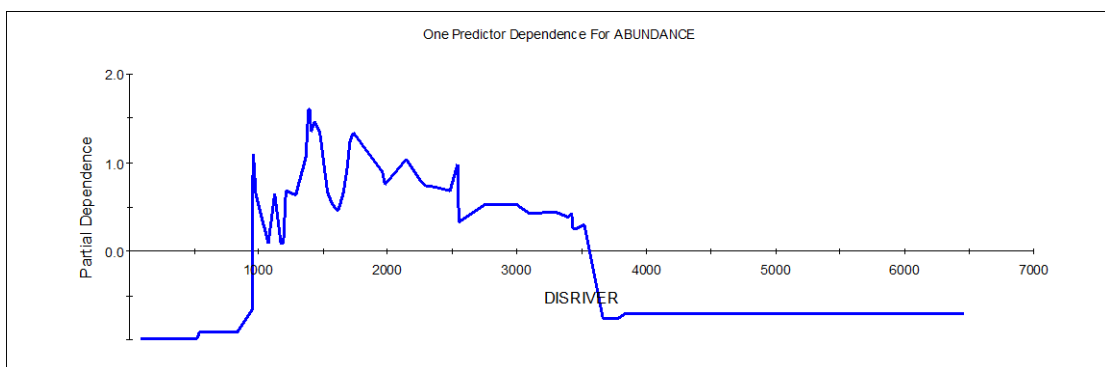

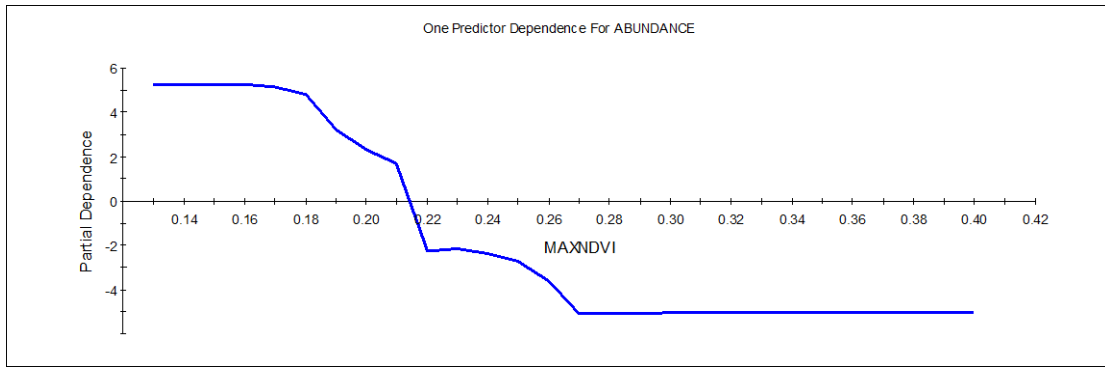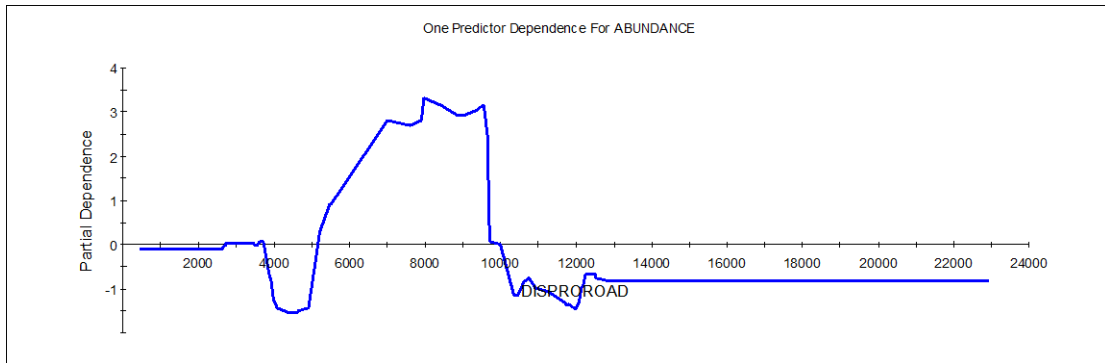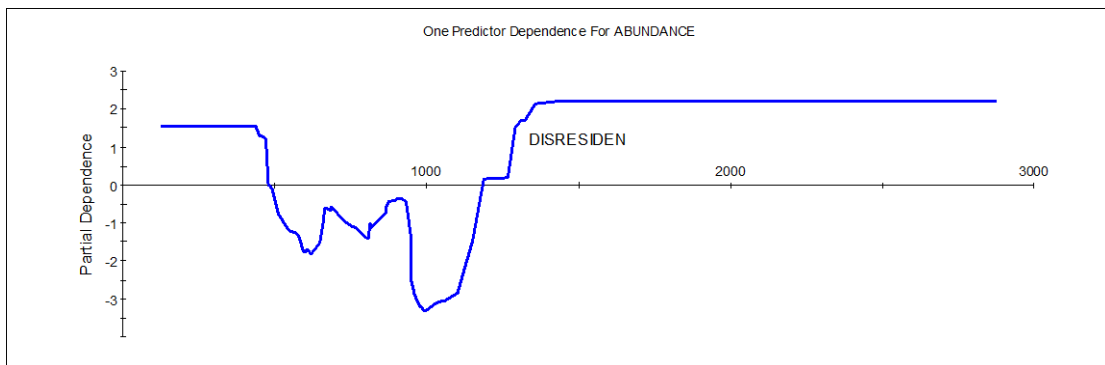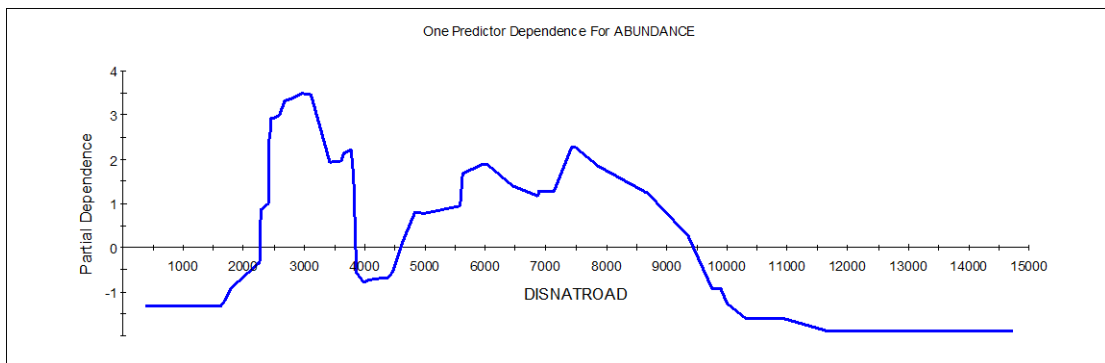

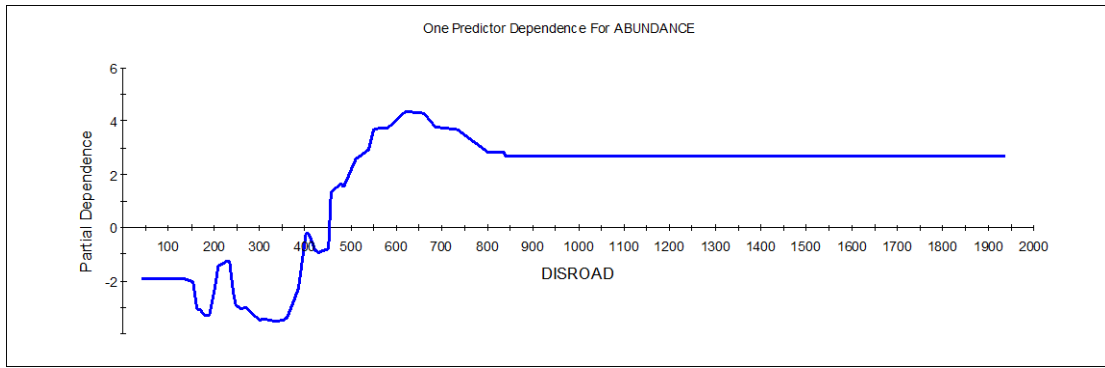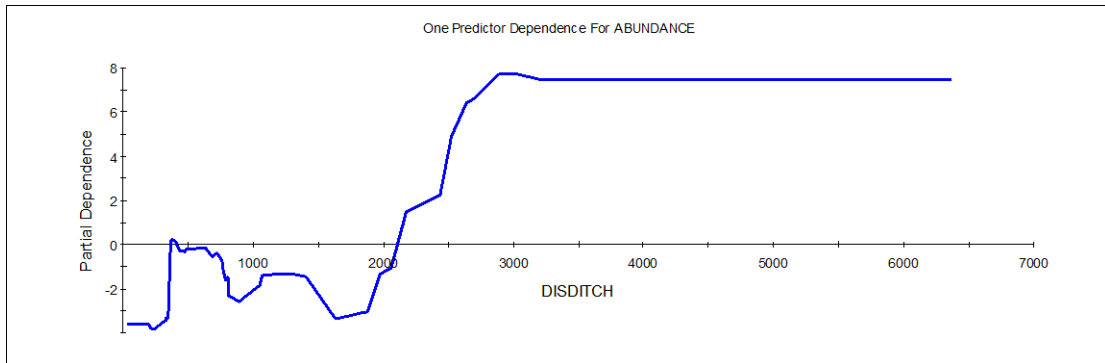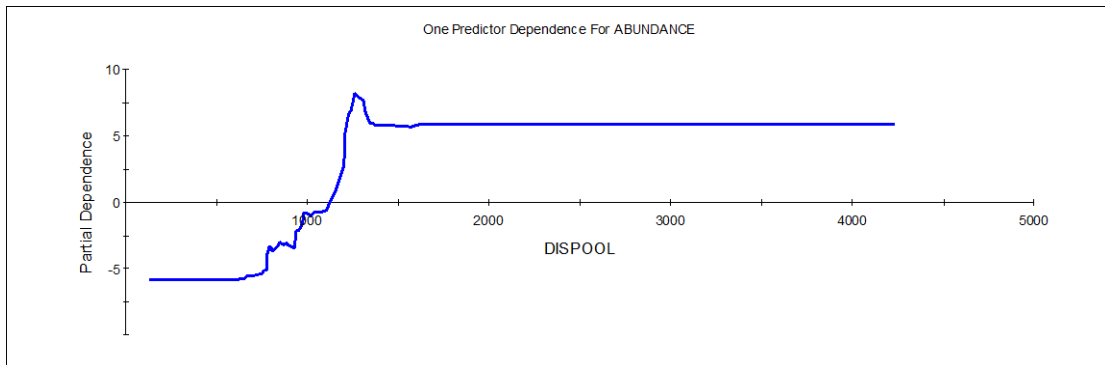

Supplement: peerj-05-4160-s002.pdf [file peerj-05-4160-s002.pdf]
