# Supplementary material for: Combining occurrence and abundance distribution models for the conservation of the Great Bustard
Source: PubMed Central journal article supplement (PMC5732545; doi:10.7717/peerj.4160), 2017-12-13

Appendix 1 Six regression algorithms (TreeNet, Random Forest, CART, MARS, Regression and CART Ensemble in SPM7) to predict abundance (prediction abundance) from observed abundance data.

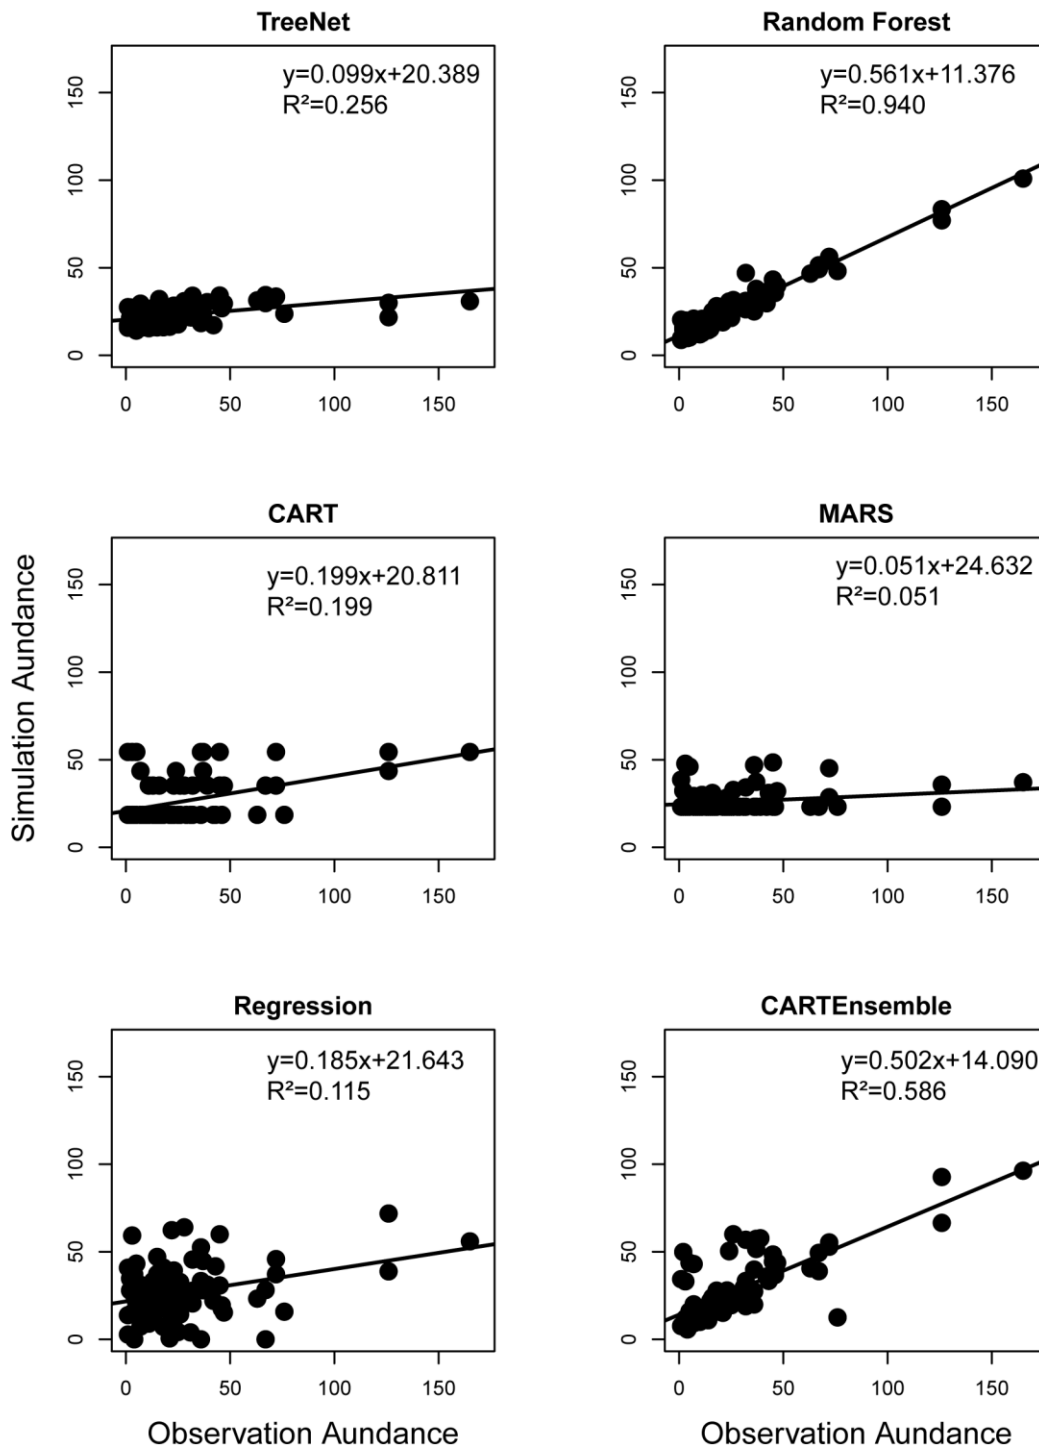

Supplement: peerj-05-4160-s001.pdf [file peerj-05-4160-s001.pdf]
